# Supplementary material
Source: ML conference proceedings conference paper supplement (https://openreview.net/forum?id=lQxSGO2kBa)

Bandwidth Analysis

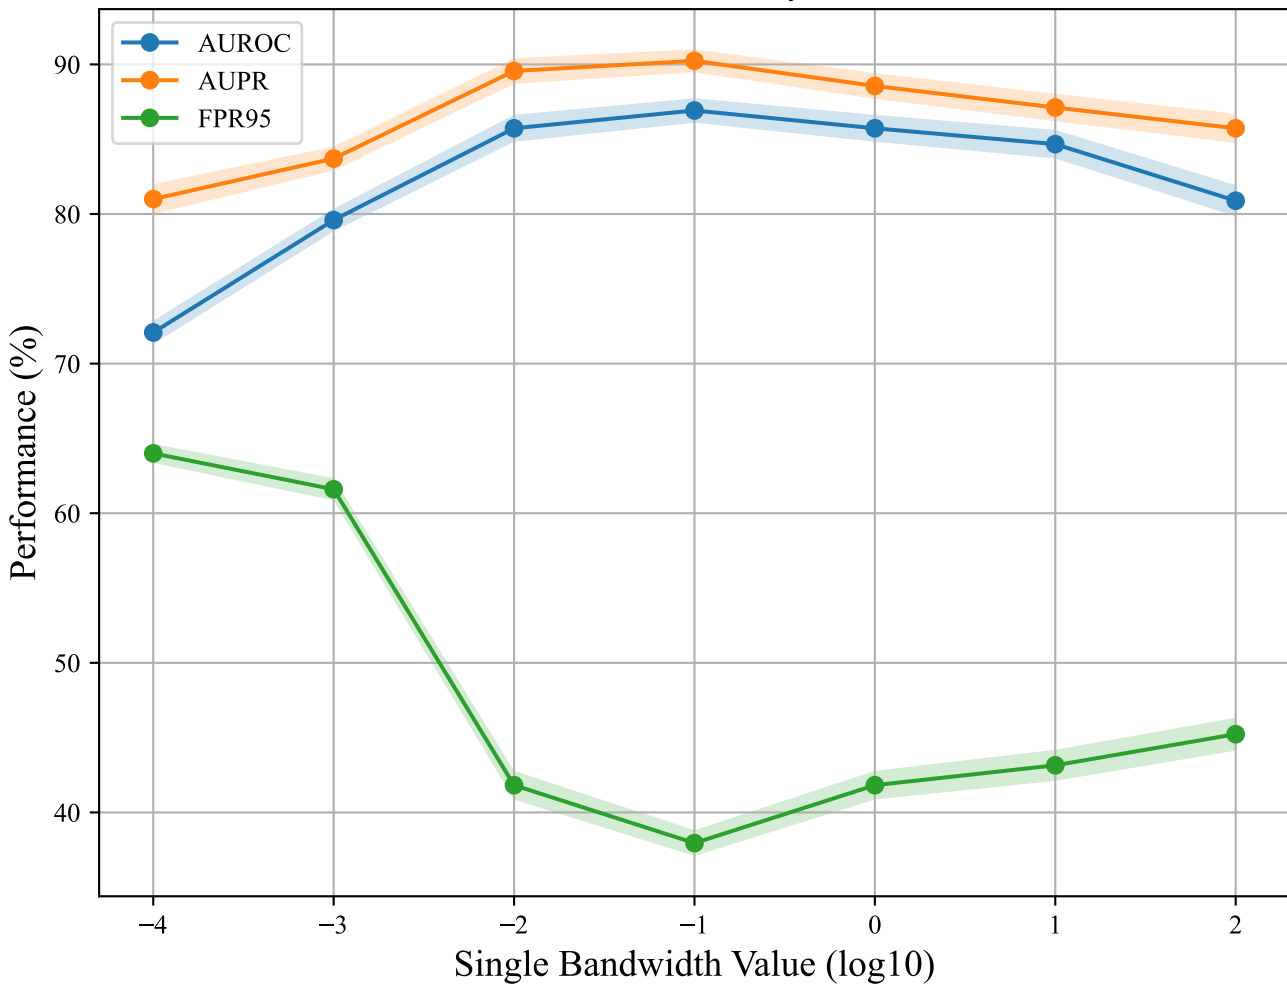

Supplement: supplementary_material [file BandwidthAnalysis.pdf › LGKDE-SupplementaryMaterial/LGKDE-Codes/figs/BandwidthAnalysis.pdf]

Effect of GNN layers

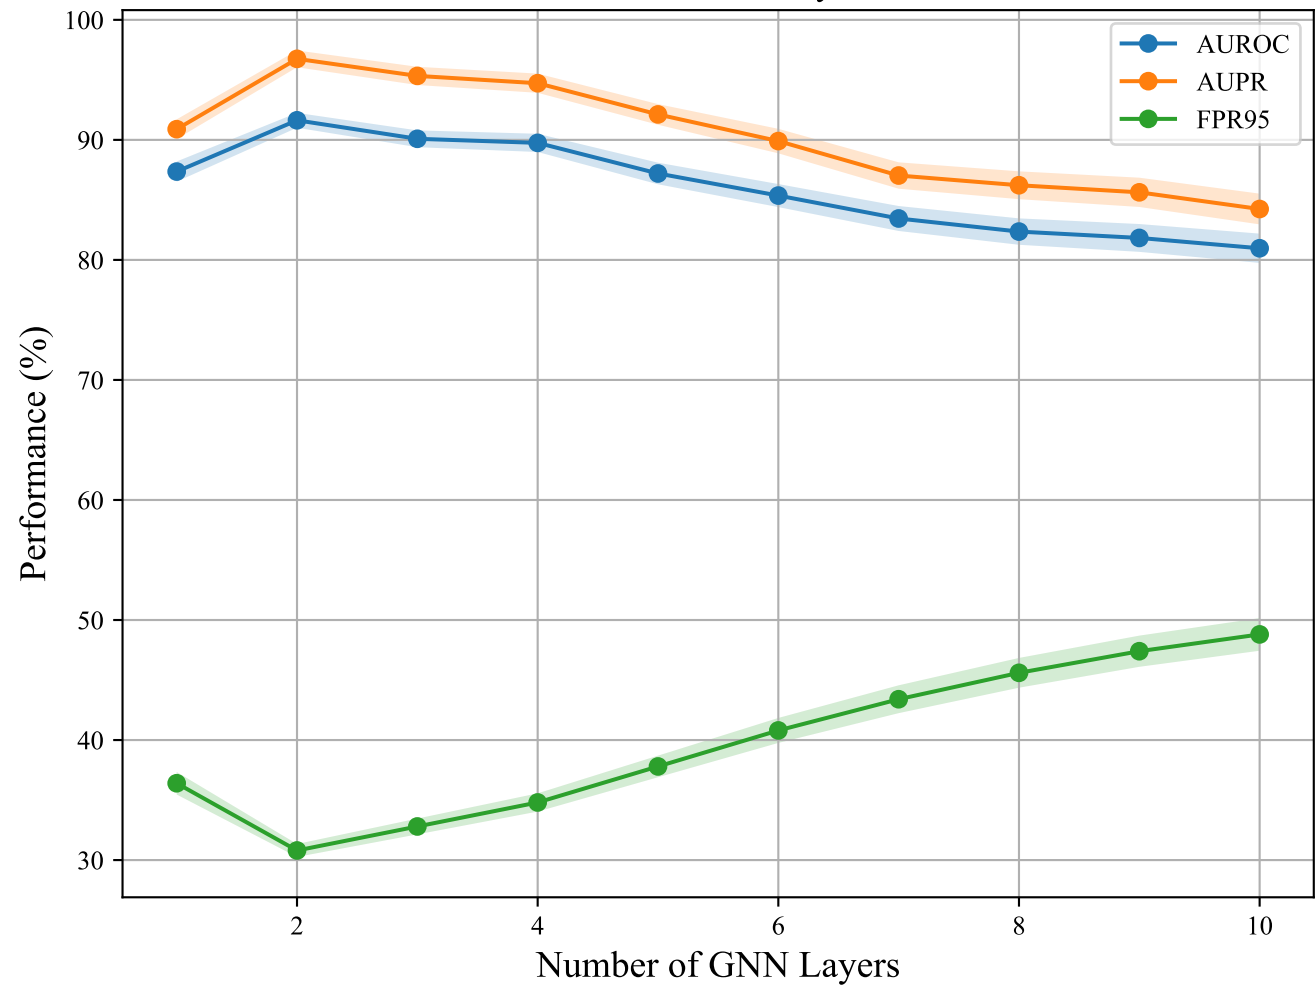

Supplement: supplementary_material [file GNNlayers.pdf › LGKDE-SupplementaryMaterial/LGKDE-Codes/figs/GNNlayers.pdf]

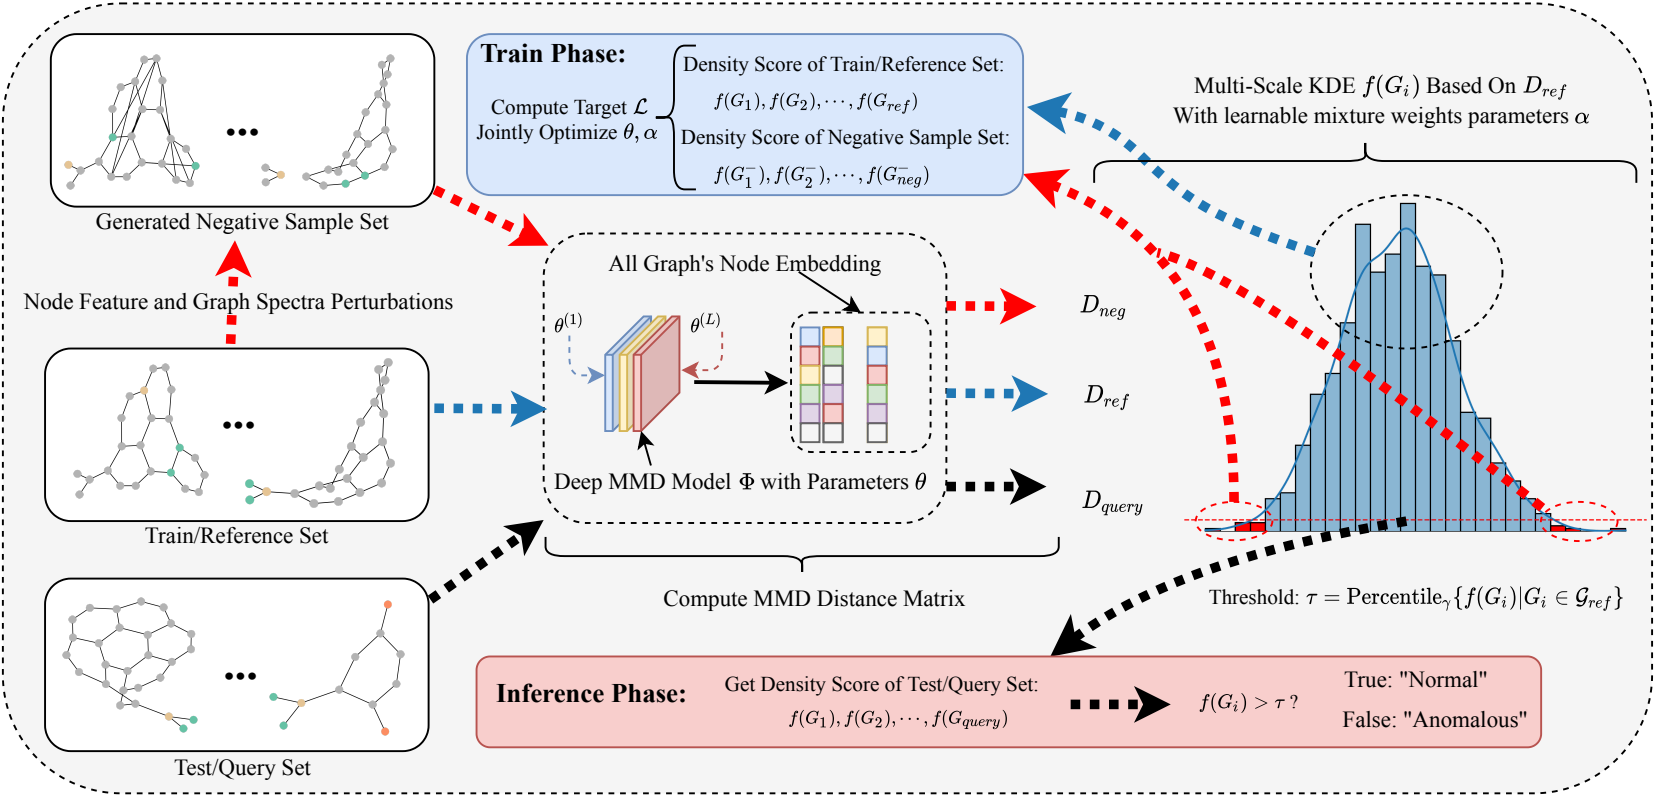

Supplement: supplementary_material [file LGKDE-framework.pdf › LGKDE-SupplementaryMaterial/LGKDE-Codes/figs/LGKDE-framework.pdf]

Robustness of Mixed Anomalies in Training Phase

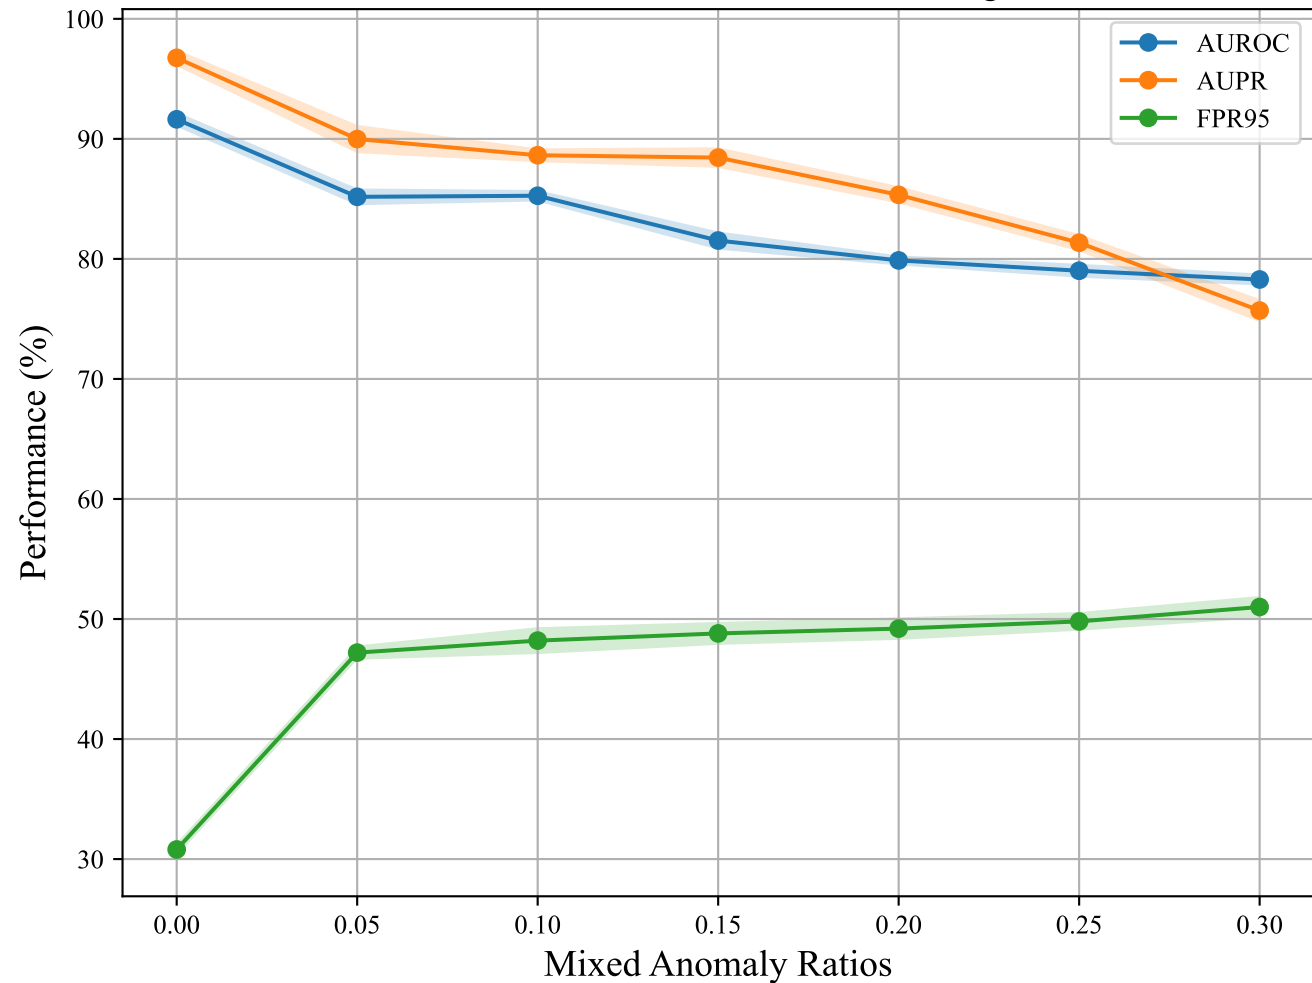

Supplement: supplementary_material [file MixedAnomaly.pdf › LGKDE-SupplementaryMaterial/LGKDE-Codes/figs/MixedAnomaly.pdf]

Original Graph

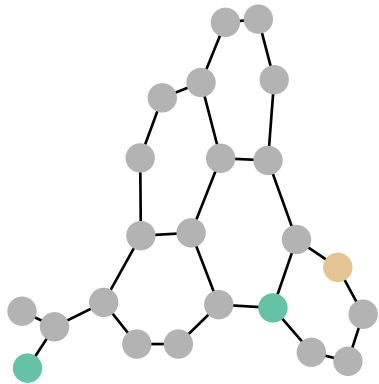

Decreased Edges

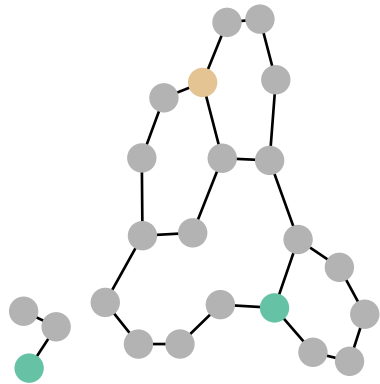

Increased Edges

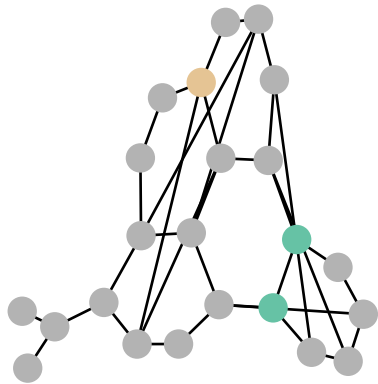

| Atom Types                                                                          |    |
|-------------------------------------------------------------------------------------|----|
|  | C  |
|  | N  |
|  | O  |
|  | F  |
|  | I  |
|  | Cl |
|  | Br |

Supplement: supplementary_material [file negative_sample_mutag_demo.pdf › LGKDE-SupplementaryMaterial/LGKDE-Codes/figs/negative_sample_mutag_demo.pdf]
